# Supplementary material for: Spread of Gamma (P.1) sub-lineages carrying Spike mutations close to the furin cleavage site and deletions in the N-terminal domain drives ongoing transmission of SARS-CoV-2 in Amazonas, Brazil
Source: bioRxiv or medRxiv preprint supplement (doi:10.1101/2021.09.12.21263453), 2021-09-15
Supplement: Supplementary file [file media-1.pdf]

**Supplementary Table 1.** Spike Mutations in 1,188 genomes of Gamma or Gamma-like lineages from Amazonas, Brazil (1st January to 6th July 2021).

|      | JANUARY<br>N = 96 |       |       |       | FEBRUARY<br>N = 104 |       |       |       | MARCH<br>N = 164 |       |       |       | APRIL<br>N = 167 |       |       |       | MAY<br>N = 286 |       |       |       | JUNE<br>N = 319 |       |       |       | JULY<br>N = 52 |       | Total<br>N =<br>1188 | Total |    |     |
|------|-------------------|-------|-------|-------|---------------------|-------|-------|-------|------------------|-------|-------|-------|------------------|-------|-------|-------|----------------|-------|-------|-------|-----------------|-------|-------|-------|----------------|-------|----------------------|-------|----|-----|
|      | 1-15              |       | 16-31 |       | 1-15                |       | 16-28 |       | 1-15             |       | 16-31 |       | 1-15             |       | 16-30 |       | 1-15           |       | 16-31 |       | 1-15            |       | 16-30 |       | 1-6            |       | n                    | %     |    |     |
|      | n                 | %     | n     | %     | n                   | %     | n     | %     | n                | %     | n     | %     | n                | %     | n     | %     | n              | %     | n     | %     | n               | %     | n     | %     | n              | %     | n                    | %     |    |     |
| AA   | 0                 | 0.0   | 0     | 0.0   | 0                   | 0.0   | 0     | 0.0   | 0                | 0.0   | 0     | 0.0   | 0                | 0.0   | 1     | 0.9   | 0              | 0.0   | 0     | 0.0   | 0               | 0.0   | 0     | 0.0   | 0              | 0.0   | 0                    | 0.0   | 1  | 0.1 |
| V3G  | 0                 | 0.0   | 0     | 0.0   | 0                   | 0.0   | 0     | 0.0   | 0                | 0.0   | 0     | 0.0   | 0                | 0.0   | 1     | 0.9   | 0              | 0.0   | 0     | 0.0   | 0               | 0.0   | 0     | 0.0   | 0              | 0.0   | 0                    | 0.0   | 1  | 0.1 |
| L5F  | 1                 | 1.8   | 1     | 2.4   | 0                   | 0.0   | 1     | 2.0   | 0                | 0.0   | 1     | 1.1   | 0                | 0.0   | 2     | 1.9   | 0              | 0.0   | 2     | 1.2   | 2               | 1.5   | 0     | 0.0   | 1              | 1.9   | 11                   | 0.9   |    |     |
| S12F | 0                 | 0.0   | 0     | 0.0   | 0                   | 0.0   | 0     | 0.0   | 1                | 1.3   | 0     | 0.0   | 0                | 0.0   | 0     | 0.0   | 0              | 0.0   | 0     | 0.0   | 0               | 0.0   | 2     | 1.1   | 0              | 0.0   | 3                    | 0.3   |    |     |
| Q14H | 0                 | 0.0   | 0     | 0.0   | 0                   | 0.0   | 0     | 0.0   | 1                | 1.3   | 1     | 1.1   | 0                | 0.0   | 0     | 0.0   | 0              | 0.0   | 1     | 0.6   | 0               | 0.0   | 0     | 0.0   | 0              | 0.0   | 3                    | 0.3   |    |     |
| L18F | 55                | 100.0 | 41    | 100.0 | 54                  | 100.0 | 50    | 100.0 | 75               | 100.0 | 89    | 100.0 | 59               | 100.0 | 108   | 100.0 | 122            | 100.0 | 164   | 100.0 | 132             | 100.0 | 187   | 100.0 | 52             | 100.0 | 1188                 | 100.0 |    |     |
| T19I | 0                 | 0.0   | 0     | 0.0   | 0                   | 0.0   | 0     | 0.0   | 0                | 0.0   | 1     | 1.1   | 0                | 0.0   | 0     | 0.0   | 0              | 0.0   | 0     | 0.0   | 0               | 0.0   | 0     | 0.0   | 0              | 0.0   | 0                    | 0.0   | 1  | 0.1 |
| T20N | 55                | 100.0 | 40    | 97.6  | 54                  | 100.0 | 50    | 100.0 | 75               | 100.0 | 87    | 97.8  | 59               | 100.0 | 108   | 100.0 | 122            | 100.0 | 164   | 100.0 | 132             | 100.0 | 187   | 100.0 | 52             | 100.0 | 1185                 | 99.7  |    |     |
| T22I | 0                 | 0.0   | 0     | 0.0   | 0                   | 0.0   | 0     | 0.0   | 0                | 0.0   | 1     | 1.1   | 0                | 0.0   | 0     | 0.0   | 0              | 0.0   | 0     | 0.0   | 0               | 0.0   | 0     | 0.0   | 0              | 0.0   | 0                    | 0.0   | 1  | 0.1 |
| P25L | 0                 | 0.0   | 0     | 0.0   | 0                   | 0.0   | 0     | 0.0   | 0                | 0.0   | 0     | 0.0   | 0                | 0.0   | 0     | 0.0   | 1              | 0.8   | 0     | 0.0   | 0               | 0.0   | 0     | 0.0   | 0              | 0.0   | 0                    | 0.0   | 1  | 0.1 |
| P25S | 0                 | 0.0   | 0     | 0.0   | 0                   | 0.0   | 0     | 0.0   | 0                | 0.0   | 0     | 0.0   | 1                | 1.7   | 0     | 0.0   | 0              | 0.0   | 0     | 0.0   | 0               | 0.0   | 0     | 0.0   | 0              | 0.0   | 0                    | 0.0   | 1  | 0.1 |
| P26S | 55                | 100.0 | 41    | 100.0 | 54                  | 100.0 | 50    | 100.0 | 75               | 100.0 | 89    | 100.0 | 59               | 100.0 | 108   | 100.0 | 122            | 100.0 | 164   | 100.0 | 132             | 100.0 | 187   | 100.0 | 52             | 100.0 | 1188                 | 100.0 |    |     |
| T29I | 0                 | 0.0   | 0     | 0.0   | 0                   | 0.0   | 0     | 0.0   | 0                | 0.0   | 0     | 0.0   | 0                | 0.0   | 0     | 0.0   | 0              | 0.0   | 0     | 0.0   | 0               | 0.0   | 1     | 0.5   | 0              | 0.0   | 0                    | 0.0   | 1  | 0.1 |
| V42I | 0                 | 0.0   | 0     | 0.0   | 0                   | 0.0   | 0     | 0.0   | 0                | 0.0   | 0     | 0.0   | 0                | 0.0   | 0     | 0.0   | 0              | 0.0   | 1     | 0.6   | 0               | 0.0   | 0     | 0.0   | 0              | 0.0   | 0                    | 0.0   | 1  | 0.1 |
| H49Y | 0                 | 0.0   | 0     | 0.0   | 0                   | 0.0   | 0     | 0.0   | 1                | 1.3   | 3     | 3.4   | 2                | 3.4   | 8     | 7.4   | 9              | 7.4   | 1     | 0.6   | 0               | 0.0   | 0     | 0.0   | 0              | 0.0   | 0                    | 0.0   | 24 | 2.0 |
| H49L | 0                 | 0.0   | 0     | 0.0   | 0                   | 0.0   | 0     | 0.0   | 0                | 0.0   | 1     | 1.1   | 0                | 0.0   | 0     | 0.0   | 0              | 0.0   | 0     | 0.0   | 0               | 0.0   | 0     | 0.0   | 0              | 0.0   | 0                    | 0.0   | 1  | 0.1 |
| A67S | 0                 | 0.0   | 0     | 0.0   | 0                   | 0.0   | 0     | 0.0   | 0                | 0.0   | 0     | 0.0   | 0                | 0.0   | 2     | 1.9   | 2              | 1.6   | 1     | 0.6   | 3               | 2.3   | 3     | 1.6   | 1              | 1.9   | 12                   | 1.0   |    |     |
| A67T | 0                 | 0.0   | 0     | 0.0   | 0                   | 0.0   | 0     | 0.0   | 0                | 0.0   | 0     | 0.0   | 0                | 0.0   | 1     | 0.9   | 0              | 0.0   | 0     | 0.0   | 0               | 0.0   | 0     | 0.0   | 0              | 0.0   | 0                    | 0.0   | 1  | 0.1 |
| I68V | 0                 | 0.0   | 0     | 0.0   | 0                   | 0.0   | 0     | 0.0   | 0                | 0.0   | 0     | 0.0   | 0                | 0.0   | 0     | 0.0   | 2              | 1.6   | 0     | 0.0   | 0               | 0.0   | 0     | 0.0   | 0              | 0.0   | 2                    | 0.2   |    |     |

|       |    |       |    |       |    |       |    |       |    |       |    |       |    |       |     |       |     |       |     |      |     |       |     |       |    |       |      |      |   |     |
|-------|----|-------|----|-------|----|-------|----|-------|----|-------|----|-------|----|-------|-----|-------|-----|-------|-----|------|-----|-------|-----|-------|----|-------|------|------|---|-----|
| T95I  | 0  | 0.0   | 0  | 0.0   | 1  | 1.9   | 0  | 0.0   | 0  | 0.0   | 0  | 0.0   | 0  | 0.0   | 0   | 0.0   | 0   | 0.0   | 0   | 0.0  | 0   | 0.0   | 0   | 0.0   | 0  | 0.0   | 1    | 0.1  |   |     |
| S98F  | 0  | 0.0   | 0  | 0.0   | 0  | 0.0   | 0  | 0.0   | 0  | 0.0   | 0  | 0.0   | 0  | 0.0   | 0   | 0.0   | 1   | 0.8   | 0   | 0.0  | 0   | 0.0   | 0   | 0.0   | 0  | 0.0   | 1    | 0.1  |   |     |
| D138Y | 55 | 100.0 | 41 | 100.0 | 51 | 94.4  | 49 | 98.0  | 75 | 100.0 | 89 | 100.0 | 59 | 100.0 | 107 | 99.1  | 121 | 99.2  | 163 | 99.4 | 132 | 100.0 | 187 | 100.0 | 52 | 100.0 | 1181 | 99.4 |   |     |
| L141F | 0  | 0.0   | 0  | 0.0   | 0  | 0.0   | 0  | 0.0   | 0  | 0.0   | 0  | 0.0   | 0  | 0.0   | 0   | 0.0   | 2   | 1.6   | 0   | 0.0  | 0   | 0.0   | 0   | 0.0   | 0  | 0.0   | 2    | 0.2  |   |     |
| Y144D | 0  | 0.0   | 0  | 0.0   | 1  | 1.9   | 0  | 0.0   | 0  | 0.0   | 0  | 0.0   | 0  | 0.0   | 0   | 0.0   | 0   | 0.0   | 0   | 0.0  | 0   | 0.0   | 0   | 0.0   | 0  | 0.0   | 1    | 0.1  |   |     |
| H146Y | 0  | 0.0   | 0  | 0.0   | 0  | 0.0   | 0  | 0.0   | 0  | 0.0   | 0  | 0.0   | 0  | 0.0   | 0   | 0.0   | 0   | 0.0   | 0   | 0.0  | 0   | 0.0   | 0   | 0.0   | 1  | 0.5   | 0    | 0.0  | 1 | 0.1 |
| W152L | 0  | 0.0   | 0  | 0.0   | 5  | 9.3   | 0  | 0.0   | 0  | 0.0   | 0  | 0.0   | 0  | 0.0   | 0   | 0.0   | 0   | 0.0   | 0   | 0.0  | 0   | 0.0   | 0   | 0.0   | 0  | 0.0   | 5    | 0.4  |   |     |
| W152C | 0  | 0.0   | 0  | 0.0   | 0  | 0.0   | 0  | 0.0   | 0  | 0.0   | 0  | 0.0   | 0  | 0.0   | 0   | 0.0   | 1   | 0.8   | 0   | 0.0  | 0   | 0.0   | 0   | 0.0   | 0  | 0.0   | 1    | 0.1  |   |     |
| M153I | 0  | 0.0   | 0  | 0.0   | 0  | 0.0   | 0  | 0.0   | 0  | 0.0   | 0  | 0.0   | 0  | 0.0   | 1   | 0.9   | 0   | 0.0   | 0   | 0.0  | 0   | 0.0   | 0   | 0.0   | 0  | 0.0   | 1    | 0.1  |   |     |
| N165D | 0  | 0.0   | 0  | 0.0   | 0  | 0.0   | 0  | 0.0   | 0  | 0.0   | 0  | 0.0   | 0  | 0.0   | 0   | 0.0   | 0   | 0.0   | 1   | 0.6  | 0   | 0.0   | 0   | 0.0   | 0  | 0.0   | 1    | 0.1  |   |     |
| P174S | 0  | 0.0   | 0  | 0.0   | 0  | 0.0   | 0  | 0.0   | 0  | 0.0   | 0  | 0.0   | 0  | 0.0   | 0   | 0.0   | 0   | 0.0   | 0   | 0.0  | 0   | 0.0   | 1   | 0.5   | 0  | 0.0   | 1    | 0.1  |   |     |
| L176F | 0  | 0.0   | 0  | 0.0   | 0  | 0.0   | 0  | 0.0   | 0  | 0.0   | 0  | 0.0   | 1  | 1.7   | 0   | 0.0   | 0   | 0.0   | 0   | 0.0  | 0   | 0.0   | 0   | 0.0   | 0  | 0.0   | 1    | 0.1  |   |     |
| K182R | 0  | 0.0   | 0  | 0.0   | 0  | 0.0   | 0  | 0.0   | 0  | 0.0   | 1  | 1.1   | 0  | 0.0   | 0   | 0.0   | 0   | 0.0   | 0   | 0.0  | 0   | 0.0   | 0   | 0.0   | 0  | 0.0   | 1    | 0.1  |   |     |
| R190S | 53 | 96.4  | 40 | 97.6  | 54 | 100.0 | 50 | 100.0 | 75 | 100.0 | 89 | 100.0 | 59 | 100.0 | 108 | 100.0 | 122 | 100.0 | 163 | 99.4 | 132 | 100.0 | 187 | 100.0 | 52 | 100.0 | 1184 | 99.7 |   |     |
| V193L | 0  | 0.0   | 0  | 0.0   | 0  | 0.0   | 0  | 0.0   | 0  | 0.0   | 0  | 0.0   | 0  | 0.0   | 0   | 0.0   | 1   | 0.8   | 0   | 0.0  | 0   | 0.0   | 0   | 0.0   | 0  | 0.0   | 1    | 0.1  |   |     |
| N211S | 0  | 0.0   | 0  | 0.0   | 0  | 0.0   | 0  | 0.0   | 0  | 0.0   | 0  | 0.0   | 1  | 1.7   | 1   | 0.9   | 1   | 0.8   | 0   | 0.0  | 0   | 0.0   | 0   | 0.0   | 0  | 0.0   | 3    | 0.3  |   |     |
| D215G | 0  | 0.0   | 0  | 0.0   | 0  | 0.0   | 0  | 0.0   | 1  | 1.3   | 1  | 1.1   | 0  | 0.0   | 4   | 3.7   | 2   | 1.6   | 1   | 0.6  | 0   | 0.0   | 0   | 0.0   | 0  | 0.0   | 9    | 0.8  |   |     |
| D215H | 0  | 0.0   | 0  | 0.0   | 0  | 0.0   | 0  | 0.0   | 0  | 0.0   | 0  | 0.0   | 0  | 0.0   | 0   | 0.0   | 0   | 0.0   | 0   | 0.0  | 0   | 0.0   | 1   | 0.5   | 0  | 0.0   | 1    | 0.1  |   |     |
| L216F | 0  | 0.0   | 0  | 0.0   | 0  | 0.0   | 1  | 2.0   | 1  | 1.3   | 0  | 0.0   | 0  | 0.0   | 0   | 0.0   | 0   | 0.0   | 0   | 0.0  | 0   | 0.0   | 0   | 0.0   | 0  | 0.0   | 2    | 0.2  |   |     |
| G232V | 0  | 0.0   | 0  | 0.0   | 0  | 0.0   | 0  | 0.0   | 1  | 1.3   | 0  | 0.0   | 0  | 0.0   | 0   | 0.0   | 0   | 0.0   | 0   | 0.0  | 0   | 0.0   | 0   | 0.0   | 0  | 0.0   | 1    | 0.1  |   |     |
| N234K | 0  | 0.0   | 0  | 0.0   | 0  | 0.0   | 0  | 0.0   | 0  | 0.0   | 0  | 0.0   | 0  | 0.0   | 0   | 0.0   | 0   | 0.0   | 1   | 0.6  | 0   | 0.0   | 0   | 0.0   | 0  | 0.0   | 1    | 0.1  |   |     |
| A243S | 0  | 0.0   | 0  | 0.0   | 0  | 0.0   | 0  | 0.0   | 0  | 0.0   | 1  | 1.1   | 3  | 5.1   | 0   | 0.0   | 0   | 0.0   | 0   | 0.0  | 0   | 0.0   | 0   | 0.0   | 0  | 0.0   | 4    | 0.3  |   |     |
| H245Y | 0  | 0.0   | 0  | 0.0   | 0  | 0.0   | 0  | 0.0   | 0  | 0.0   | 0  | 0.0   | 0  | 0.0   | 0   | 0.0   | 0   | 0.0   | 0   | 0.0  | 1   | 0.8   | 0   | 0.0   | 0  | 0.0   | 1    | 0.1  |   |     |
| P251L | 0  | 0.0   | 0  | 0.0   | 0  | 0.0   | 0  | 0.0   | 0  | 0.0   | 0  | 0.0   | 0  | 0.0   | 0   | 0.0   | 0   | 0.0   | 0   | 0.0  | 0   | 0.0   | 0   | 0.0   | 1  | 1.9   | 1    | 0.1  |   |     |



|       |    |       |    |       |    |       |    |       |    |       |    |       |    |       |     |       |     |       |     |       |     |       |     |       |    |       |      |       |   |     |
|-------|----|-------|----|-------|----|-------|----|-------|----|-------|----|-------|----|-------|-----|-------|-----|-------|-----|-------|-----|-------|-----|-------|----|-------|------|-------|---|-----|
| T572I | 0  | 0.0   | 0  | 0.0   | 0  | 0.0   | 0  | 0.0   | 0  | 0.0   | 0  | 0.0   | 0  | 0.0   | 0   | 0.0   | 0   | 0.0   | 0   | 0.0   | 0   | 0.0   | 1   | 0.5   | 0  | 0.0   | 1    | 0.1   |   |     |
| E583G | 0  | 0.0   | 0  | 0.0   | 0  | 0.0   | 0  | 0.0   | 0  | 0.0   | 0  | 0.0   | 0  | 0.0   | 0   | 0.0   | 0   | 0.0   | 0   | 0.0   | 1   | 0.8   | 0   | 0.0   | 0  | 0.0   | 1    | 0.1   |   |     |
| P589Q | 0  | 0.0   | 0  | 0.0   | 0  | 0.0   | 0  | 0.0   | 0  | 0.0   | 0  | 0.0   | 0  | 0.0   | 0   | 0.0   | 0   | 0.0   | 0   | 0.0   | 0   | 0.0   | 1   | 0.5   | 0  | 0.0   | 1    | 0.1   |   |     |
| Q607H | 0  | 0.0   | 0  | 0.0   | 0  | 0.0   | 0  | 0.0   | 0  | 0.0   | 0  | 0.0   | 0  | 0.0   | 0   | 0.0   | 1   | 0.8   | 0   | 0.0   | 0   | 0.0   | 0   | 0.0   | 0  | 0.0   | 1    | 0.1   |   |     |
| Q613H | 0  | 0.0   | 0  | 0.0   | 0  | 0.0   | 0  | 0.0   | 0  | 0.0   | 0  | 0.0   | 0  | 0.0   | 1   | 0.9   | 0   | 0.0   | 0   | 0.0   | 0   | 0.0   | 0   | 0.0   | 0  | 0.0   | 1    | 0.1   |   |     |
| Q613E | 0  | 0.0   | 0  | 0.0   | 0  | 0.0   | 0  | 0.0   | 0  | 0.0   | 0  | 0.0   | 0  | 0.0   | 0   | 0.0   | 0   | 0.0   | 0   | 0.0   | 0   | 0.0   | 0   | 0.0   | 0  | 0.0   | 2    | 3.8   | 2 | 0.2 |
| D614G | 55 | 100.0 | 41 | 100.0 | 54 | 100.0 | 50 | 100.0 | 75 | 100.0 | 89 | 100.0 | 59 | 100.0 | 108 | 100.0 | 122 | 100.0 | 164 | 100.0 | 132 | 100.0 | 187 | 100.0 | 52 | 100.0 | 1188 | 100.0 |   |     |
| E619K | 0  | 0.0   | 0  | 0.0   | 0  | 0.0   | 0  | 0.0   | 0  | 0.0   | 0  | 0.0   | 1  | 1.7   | 0   | 0.0   | 0   | 0.0   | 0   | 0.0   | 0   | 0.0   | 0   | 0.0   | 0  | 0.0   | 1    | 0.1   |   |     |
| V622F | 0  | 0.0   | 0  | 0.0   | 0  | 0.0   | 0  | 0.0   | 0  | 0.0   | 0  | 0.0   | 0  | 0.0   | 0   | 0.0   | 0   | 0.0   | 0   | 0.0   | 0   | 0.0   | 1   | 0.5   | 0  | 0.0   | 1    | 0.1   |   |     |
| D627Y | 0  | 0.0   | 0  | 0.0   | 0  | 0.0   | 0  | 0.0   | 0  | 0.0   | 0  | 0.0   | 0  | 0.0   | 0   | 0.0   | 0   | 0.0   | 0   | 0.0   | 2   | 1.5   | 0   | 0.0   | 0  | 0.0   | 2    | 0.2   |   |     |
| A653V | 0  | 0.0   | 0  | 0.0   | 0  | 0.0   | 0  | 0.0   | 0  | 0.0   | 1  | 1.1   | 0  | 0.0   | 0   | 0.0   | 0   | 0.0   | 0   | 0.0   | 0   | 0.0   | 1   | 0.5   | 0  | 0.0   | 2    | 0.2   |   |     |
| E654A | 0  | 0.0   | 0  | 0.0   | 0  | 0.0   | 0  | 0.0   | 0  | 0.0   | 0  | 0.0   | 0  | 0.0   | 0   | 0.0   | 0   | 0.0   | 0   | 0.0   | 0   | 0.0   | 0   | 0.0   | 1  | 1.9   | 1    | 0.1   |   |     |
| H655Y | 55 | 100.0 | 40 | 97.6  | 54 | 100.0 | 50 | 100.0 | 75 | 100.0 | 89 | 100.0 | 59 | 100.0 | 108 | 100.0 | 122 | 100.0 | 164 | 100.0 | 132 | 100.0 | 187 | 100.0 | 52 | 100.0 | 1187 | 99.9  |   |     |
| S659L | 0  | 0.0   | 0  | 0.0   | 1  | 1.9   | 0  | 0.0   | 0  | 0.0   | 0  | 0.0   | 0  | 0.0   | 0   | 0.0   | 0   | 0.0   | 0   | 0.0   | 0   | 0.0   | 0   | 0.0   | 0  | 0.0   | 1    | 0.1   |   |     |
| Q675H | 0  | 0.0   | 0  | 0.0   | 0  | 0.0   | 0  | 0.0   | 0  | 0.0   | 0  | 0.0   | 0  | 0.0   | 2   | 1.9   | 0   | 0.0   | 0   | 0.0   | 2   | 1.5   | 0   | 0.0   | 0  | 0.0   | 4    | 0.3   |   |     |
| N679K | 0  | 0.0   | 0  | 0.0   | 0  | 0.0   | 0  | 0.0   | 0  | 0.0   | 3  | 3.4   | 7  | 11.9  | 24  | 22.2  | 21  | 17.2  | 53  | 32.3  | 54  | 40.9  | 100 | 53.5  | 40 | 76.9  | 302  | 25.4  |   |     |
| P681H | 0  | 0.0   | 0  | 0.0   | 0  | 0.0   | 0  | 0.0   | 0  | 0.0   | 1  | 1.1   | 4  | 6.8   | 14  | 13.0  | 25  | 20.5  | 48  | 29.3  | 49  | 37.1  | 61  | 32.6  | 7  | 13.5  | 209  | 17.6  |   |     |
| P681T | 0  | 0.0   | 0  | 0.0   | 0  | 0.0   | 0  | 0.0   | 0  | 0.0   | 0  | 0.0   | 0  | 0.0   | 1   | 0.9   | 0   | 0.0   | 0   | 0.0   | 0   | 0.0   | 0   | 0.0   | 0  | 0.0   | 1    | 0.1   |   |     |
| P681R | 0  | 0.0   | 0  | 0.0   | 0  | 0.0   | 0  | 0.0   | 0  | 0.0   | 0  | 0.0   | 0  | 0.0   | 0   | 0.0   | 0   | 0.0   | 0   | 0.0   | 1   | 0.8   | 0   | 0.0   | 0  | 0.0   | 1    | 0.1   |   |     |
| T719I | 0  | 0.0   | 0  | 0.0   | 0  | 0.0   | 0  | 0.0   | 0  | 0.0   | 0  | 0.0   | 0  | 0.0   | 0   | 0.0   | 0   | 0.0   | 0   | 0.0   | 0   | 0.0   | 1   | 0.5   | 0  | 0.0   | 1    | 0.1   |   |     |
| E725D | 0  | 0.0   | 0  | 0.0   | 0  | 0.0   | 0  | 0.0   | 0  | 0.0   | 0  | 0.0   | 0  | 0.0   | 2   | 1.9   | 0   | 0.0   | 0   | 0.0   | 0   | 0.0   | 0   | 0.0   | 0  | 0.0   | 2    | 0.2   |   |     |
| T732I | 0  | 0.0   | 0  | 0.0   | 0  | 0.0   | 0  | 0.0   | 0  | 0.0   | 0  | 0.0   | 0  | 0.0   | 0   | 0.0   | 0   | 0.0   | 0   | 0.0   | 0   | 0.0   | 1   | 0.5   | 0  | 0.0   | 1    | 0.1   |   |     |
| I770V | 0  | 0.0   | 0  | 0.0   | 0  | 0.0   | 0  | 0.0   | 0  | 0.0   | 0  | 0.0   | 0  | 0.0   | 0   | 0.0   | 0   | 0.0   | 1   | 0.6   | 0   | 0.0   | 0   | 0.0   | 0  | 0.0   | 1    | 0.1   |   |     |
| Q779K | 0  | 0.0   | 0  | 0.0   | 0  | 0.0   | 0  | 0.0   | 0  | 0.0   | 0  | 0.0   | 0  | 0.0   | 1   | 0.9   | 0   | 0.0   | 0   | 0.0   | 0   | 0.0   | 0   | 0.0   | 0  | 0.0   | 1    | 0.1   |   |     |

|        |    |       |    |       |    |       |    |       |    |       |    |       |    |       |     |       |     |       |     |       |     |       |     |       |    |       |      |       |
|--------|----|-------|----|-------|----|-------|----|-------|----|-------|----|-------|----|-------|-----|-------|-----|-------|-----|-------|-----|-------|-----|-------|----|-------|------|-------|
| E780D  | 1  | 1.8   | 0  | 0.0   | 0  | 0.0   | 0  | 0.0   | 0  | 0.0   | 0  | 0.0   | 0  | 0.0   | 0   | 0.0   | 0   | 0.0   | 0   | 0.0   | 0   | 0.0   | 0   | 0.0   | 0  | 0.0   | 1    | 0.1   |
| P809L  | 0  | 0.0   | 0  | 0.0   | 0  | 0.0   | 0  | 0.0   | 0  | 0.0   | 0  | 0.0   | 0  | 0.0   | 0   | 0.0   | 0   | 0.0   | 0   | 0.0   | 0   | 0.0   | 1   | 0.5   | 0  | 0.0   | 1    | 0.1   |
| P812L  | 0  | 0.0   | 0  | 0.0   | 1  | 1.9   | 0  | 0.0   | 0  | 0.0   | 0  | 0.0   | 0  | 0.0   | 0   | 0.0   | 0   | 0.0   | 0   | 0.0   | 0   | 0.0   | 0   | 0.0   | 0  | 0.0   | 1    | 0.1   |
| D839G  | 0  | 0.0   | 0  | 0.0   | 0  | 0.0   | 1  | 2.0   | 0  | 0.0   | 0  | 0.0   | 0  | 0.0   | 0   | 0.0   | 0   | 0.0   | 0   | 0.0   | 0   | 0.0   | 0   | 0.0   | 0  | 0.0   | 1    | 0.1   |
| A852V  | 0  | 0.0   | 0  | 0.0   | 0  | 0.0   | 0  | 0.0   | 0  | 0.0   | 0  | 0.0   | 0  | 0.0   | 0   | 0.0   | 1   | 0.8   | 1   | 0.6   | 0   | 0.0   | 0   | 0.0   | 0  | 0.0   | 2    | 0.2   |
| T859I  | 0  | 0.0   | 0  | 0.0   | 0  | 0.0   | 0  | 0.0   | 0  | 0.0   | 1  | 1.1   | 0  | 0.0   | 0   | 0.0   | 0   | 0.0   | 0   | 0.0   | 0   | 0.0   | 0   | 0.0   | 0  | 0.0   | 1    | 0.1   |
| V860L  | 0  | 0.0   | 0  | 0.0   | 0  | 0.0   | 0  | 0.0   | 0  | 0.0   | 1  | 1.1   | 0  | 0.0   | 0   | 0.0   | 0   | 0.0   | 0   | 0.0   | 0   | 0.0   | 0   | 0.0   | 0  | 0.0   | 1    | 0.1   |
| I870V  | 0  | 0.0   | 0  | 0.0   | 0  | 0.0   | 0  | 0.0   | 2  | 2.7   | 0  | 0.0   | 0  | 0.0   | 0   | 0.0   | 0   | 0.0   | 0   | 0.0   | 0   | 0.0   | 0   | 0.0   | 0  | 0.0   | 2    | 0.2   |
| A871V  | 0  | 0.0   | 0  | 0.0   | 0  | 0.0   | 1  | 2.0   | 0  | 0.0   | 0  | 0.0   | 0  | 0.0   | 0   | 0.0   | 0   | 0.0   | 0   | 0.0   | 0   | 0.0   | 0   | 0.0   | 0  | 0.0   | 1    | 0.1   |
| T883I  | 0  | 0.0   | 0  | 0.0   | 0  | 0.0   | 1  | 2.0   | 0  | 0.0   | 0  | 0.0   | 0  | 0.0   | 0   | 0.0   | 0   | 0.0   | 0   | 0.0   | 0   | 0.0   | 0   | 0.0   | 0  | 0.0   | 1    | 0.1   |
| S939F  | 0  | 0.0   | 0  | 0.0   | 0  | 0.0   | 0  | 0.0   | 0  | 0.0   | 0  | 0.0   | 0  | 0.0   | 0   | 0.0   | 0   | 0.0   | 0   | 0.0   | 0   | 0.0   | 1   | 0.5   | 0  | 0.0   | 1    | 0.1   |
| A942V  | 0  | 0.0   | 0  | 0.0   | 0  | 0.0   | 0  | 0.0   | 0  | 0.0   | 0  | 0.0   | 0  | 0.0   | 0   | 0.0   | 0   | 0.0   | 0   | 0.0   | 0   | 0.0   | 1   | 0.5   | 0  | 0.0   | 1    | 0.1   |
| Q954L  | 0  | 0.0   | 0  | 0.0   | 0  | 0.0   | 0  | 0.0   | 0  | 0.0   | 0  | 0.0   | 0  | 0.0   | 0   | 0.0   | 0   | 0.0   | 0   | 0.0   | 0   | 0.0   | 1   | 0.5   | 1  | 1.9   | 2    | 0.2   |
| A1020V | 0  | 0.0   | 0  | 0.0   | 0  | 0.0   | 0  | 0.0   | 0  | 0.0   | 0  | 0.0   | 0  | 0.0   | 0   | 0.0   | 0   | 0.0   | 0   | 0.0   | 1   | 0.8   | 0   | 0.0   | 1  | 1.9   | 2    | 0.2   |
| T1027I | 55 | 100.0 | 40 | 97.6  | 54 | 100.0 | 50 | 100.0 | 75 | 100.0 | 89 | 100.0 | 59 | 100.0 | 108 | 100.0 | 122 | 100.0 | 164 | 100.0 | 132 | 100.0 | 187 | 100.0 | 52 | 100.0 | 1187 | 99.9  |
| A1078S | 0  | 0.0   | 0  | 0.0   | 0  | 0.0   | 1  | 2.0   | 0  | 0.0   | 0  | 0.0   | 0  | 0.0   | 0   | 0.0   | 0   | 0.0   | 0   | 0.0   | 0   | 0.0   | 0   | 0.0   | 0  | 0.0   | 1    | 0.1   |
| D1084Y | 0  | 0.0   | 0  | 0.0   | 0  | 0.0   | 1  | 2.0   | 0  | 0.0   | 0  | 0.0   | 0  | 0.0   | 0   | 0.0   | 0   | 0.0   | 0   | 0.0   | 0   | 0.0   | 0   | 0.0   | 0  | 0.0   | 1    | 0.1   |
| R1091H | 0  | 0.0   | 0  | 0.0   | 0  | 0.0   | 0  | 0.0   | 0  | 0.0   | 0  | 0.0   | 0  | 0.0   | 0   | 0.0   | 1   | 0.8   | 1   | 0.6   | 0   | 0.0   | 0   | 0.0   | 0  | 0.0   | 2    | 0.2   |
| T1117I | 0  | 0.0   | 0  | 0.0   | 0  | 0.0   | 0  | 0.0   | 1  | 1.3   | 0  | 0.0   | 0  | 0.0   | 0   | 0.0   | 0   | 0.0   | 0   | 0.0   | 0   | 0.0   | 0   | 0.0   | 0  | 0.0   | 1    | 0.1   |
| D1139H | 0  | 0.0   | 1  | 2.4   | 0  | 0.0   | 0  | 0.0   | 0  | 0.0   | 0  | 0.0   | 0  | 0.0   | 0   | 0.0   | 0   | 0.0   | 0   | 0.0   | 0   | 0.0   | 0   | 0.0   | 0  | 0.0   | 1    | 0.1   |
| D1153Y | 0  | 0.0   | 2  | 4.9   | 0  | 0.0   | 0  | 0.0   | 0  | 0.0   | 0  | 0.0   | 0  | 0.0   | 0   | 0.0   | 0   | 0.0   | 0   | 0.0   | 0   | 0.0   | 0   | 0.0   | 0  | 0.0   | 2    | 0.2   |
| D1168Y | 0  | 0.0   | 0  | 0.0   | 0  | 0.0   | 0  | 0.0   | 1  | 1.3   | 0  | 0.0   | 0  | 0.0   | 0   | 0.0   | 0   | 0.0   | 0   | 0.0   | 0   | 0.0   | 0   | 0.0   | 0  | 0.0   | 1    | 0.1   |
| G1171V | 0  | 0.0   | 0  | 0.0   | 0  | 0.0   | 0  | 0.0   | 0  | 0.0   | 0  | 0.0   | 0  | 0.0   | 0   | 0.0   | 1   | 0.8   | 2   | 1.2   | 0   | 0.0   | 0   | 0.0   | 0  | 0.0   | 3    | 0.3   |
| V1176F | 55 | 100.0 | 41 | 100.0 | 54 | 100.0 | 50 | 100.0 | 75 | 100.0 | 89 | 100.0 | 59 | 100.0 | 108 | 100.0 | 122 | 100.0 | 164 | 100.0 | 132 | 100.0 | 187 | 100.0 | 52 | 100.0 | 1188 | 100.0 |

|        |   |     |   |     |   |     |   |     |   |     |   |     |   |     |   |     |   |     |   |     |   |     |   |     |   |     |   |     |   |     |
|--------|---|-----|---|-----|---|-----|---|-----|---|-----|---|-----|---|-----|---|-----|---|-----|---|-----|---|-----|---|-----|---|-----|---|-----|---|-----|
| E1182Q | 0 | 0.0 | 0 | 0.0 | 0 | 0.0 | 0 | 0.0 | 0 | 0.0 | 0 | 0.0 | 0 | 0.0 | 0 | 0.0 | 0 | 0.0 | 0 | 0.0 | 0 | 0.0 | 0 | 0.0 | 0 | 0.0 | 1 | 1.9 | 1 | 0.1 |
| L1234F | 0 | 0.0 | 1 | 2.4 | 1 | 1.9 | 0 | 0.0 | 0 | 0.0 | 0 | 0.0 | 0 | 0.0 | 0 | 0.0 | 0 | 0.0 | 0 | 0.0 | 0 | 0.0 | 0 | 0.0 | 0 | 0.0 | 0 | 0.0 | 2 | 0.2 |
| C1235F | 0 | 0.0 | 0 | 0.0 | 0 | 0.0 | 0 | 0.0 | 0 | 0.0 | 0 | 0.0 | 0 | 0.0 | 0 | 0.0 | 0 | 0.0 | 0 | 0.0 | 1 | 0.8 | 0 | 0.0 | 0 | 0.0 | 0 | 0.0 | 1 | 0.1 |
| S1252F | 0 | 0.0 | 0 | 0.0 | 0 | 0.0 | 0 | 0.0 | 0 | 0.0 | 1 | 1.1 | 0 | 0.0 | 0 | 0.0 | 0 | 0.0 | 0 | 0.0 | 0 | 0.0 | 0 | 0.0 | 0 | 0.0 | 0 | 0.0 | 1 | 0.1 |
| E1258D | 0 | 0.0 | 0 | 0.0 | 0 | 0.0 | 0 | 0.0 | 0 | 0.0 | 0 | 0.0 | 2 | 3.4 | 0 | 0.0 | 0 | 0.0 | 0 | 0.0 | 0 | 0.0 | 0 | 0.0 | 0 | 0.0 | 0 | 0.0 | 2 | 0.2 |
| D1259Y | 0 | 0.0 | 0 | 0.0 | 0 | 0.0 | 0 | 0.0 | 0 | 0.0 | 1 | 1.1 | 0 | 0.0 | 0 | 0.0 | 0 | 0.0 | 0 | 0.0 | 0 | 0.0 | 0 | 0.0 | 0 | 0.0 | 0 | 0.0 | 1 | 0.1 |
| S1261F | 0 | 0.0 | 0 | 0.0 | 0 | 0.0 | 0 | 0.0 | 0 | 0.0 | 0 | 0.0 | 0 | 0.0 | 0 | 0.0 | 0 | 0.0 | 1 | 0.6 | 0 | 0.0 | 0 | 0.0 | 0 | 0.0 | 0 | 0.0 | 1 | 0.1 |

Legend. Spike mutations (AA) are represented by the wild-type amino acid (1-letter code) - residue position - and the mutant amino acid. The total number (N) of genomes generated each month, as well as the number (n) and the percentage (%) of each mutation at different time intervals, are shown. More than one mutant residue was observed in eight positions (P25L or P25S, H49Y or H49L, A67S or A67T, W152L or W152C, D215G or D215H, T259I or T259A, Q613H or Q613E, and P681H or P681T or P681R). Four mutations at the furin cleavage site were observed. N679K in 302 genomes, P681H in 209 genomes, P681R and P681T found in one genome each. The spike mutations N679K and P681H showed a sharp increase from 3.4% (N679K) and 1.1% (P681H) in late March to 76.9% (N679K) and 13.5% (P681H) in early July. Together, genomes carrying furin site mutations (N679K or P681H) represent more than 90% of those sequenced in July.
