# Supplementary material for: Spread of Gamma (P.1) sub-lineages carrying Spike mutations close to the furin cleavage site and deletions in the N-terminal domain drives ongoing transmission of SARS-CoV-2 in Amazonas, Brazil
Source: bioRxiv or medRxiv preprint supplement (doi:10.1101/2021.09.12.21263453), 2021-09-15
Supplement: Supplementary file [file media-4.pdf]

## SUPPLEMENTARY INFORMATION MATERIAL

### Atomistic Simulations Additional Information

Prior to the metadynamics simulations, all systems were equilibrated by means of a 5-ns molecular dynamics (MD) simulation. The classical atomistic simulations were performed for the furin enzyme complexed to the wild-type SARS-CoV-2 Spike protein loop, and N679K, P681H and P681R variants, modeled as described above and with the N/C-termini capped. The complexes were embedded in the center of an orthorhombic box with edge dimensions of 2.0 nm of distance from the center of the solute. The systems were solvated with explicit solvent molecules described by the SPC water model<sup>1</sup>. Sodium and chloride ions were added to neutralize each system's total charge while reproducing a buffer of saline solution at 150 nM. The systems were initially energy minimized using 10,000 steps of the steepest descent algorithm. Periodic boundary conditions were applied in the x, y, and z directions. Holonomic constraints were applied to the bond lengths involving hydrogen atoms in the solute using the LINCS algorithm<sup>2</sup>, allowing a 2.0 fs integration time step, in which the leap-frog algorithm was used to integrate the equations of motion. Short-range electrostatics and van der Waals interactions were calculated within the cutoff radius of 1.4 nm. Long-range electrostatics corrections were taken into account by using the reaction-field<sup>3</sup> method beyond a cutoff of 1.4 nm in conjunction with a permittivity dielectric constant of 66. All MD simulations were carried out using the GROMOS parameter set 54A7<sup>4</sup> for the protein, and the GROMOS 53A6<sup>5</sup> parameter set for the ions, within the GROMACS 4.6.7<sup>6</sup>. The equilibration was conducted in the NVT ensemble (constant number of particles, volume, and temperature). The reference temperature was kept at 310 K separately coupling separate v-rescale thermostats<sup>7</sup> for the solute and solvent (electrolytes included) with a relaxation time of 1.0 ps. The systems were previously thermalized by generating initial velocities from a Maxwell-Boltzmann distribution starting at 5 K and progressively increasing to the reference temperature. The simulations were carried out with a 1,000 kJ.mol<sup>-1</sup> force constant applied to the heavy-backbone atoms of the proteins, allowing only the rearrangement of the water molecules around the solute.

The last frame of the previously equilibrated restrained MD simulations was used as the starting point to the metadynamics. The peptides were steered from their binding sites by defining the collective variables (CV) as the distance between the center of mass of the peptide's  $\alpha$ -carbons and the center of mass of the  $\alpha$ -carbons of the furin residues interacting initially at 3 Å distant from the peptide. For metadynamics simulations the positional restraints were released, except for the coordinated-Ca<sup>2+</sup> ions in the furin, in which a 1,000 kJ.mol<sup>-1</sup> force was applied to restrain their position to the coordinated residues. The

exploration of the CV phase space was accomplished by adding Gaussian potentials of height 0.05 kJ/mol and depth of 0.05 nm every 1.0 ps. CVs sampling and calculations were performed for 50 ns via the PLUMED 2.3.5 plugin<sup>8</sup> interfaced with the GROMACS v. 4.6.7. The simulations setup for the metadynamics was the same as described for the restrained MD simulations, save for the inclusion of the Parrinello-Rahman (PR) barostat scheme<sup>9, 10</sup> with a relaxation time of 2.0 ps, leading to simulations in the isothermal-isobaric ensemble (NpT). The choice of PR method for the metadynamics calculations, despite the second-order approach to equilibrium, relies on its correct reproduction of the exact NpT ensemble, which is more appropriate when obtaining thermodynamic quantities. The peptides were detached from the protein along the CV pathway, and the free energy surface (FES) of the process was recursively reconstructed using the sum\_hills tool.

## References

1. Berendsen, H. J. C.; Postma, J. P. M.; Van Gunsteren, W. F.; Hermans, a. J., Intermolecular Forces. Reidel, Dordrecht Jerusalem, Israel: 1981.
2. Hess, B.; Bekker, H.; Berendsen, H. J. C.; Fraaije, J. G. E. M., Lincs: A Linear Constraint Solver for Molecular Simulations. *Journal of computational chemistry* **1997**, *18*, 1463-1472.
3. Tironi, I. G.; Sperb, R.; Smith, P. E.; van Gunsteren, W. F., A Generalized Reaction Field Method for Molecular Dynamics Simulations. *The Journal of Chemical Physics* **1995**, *102*, 5451-5459.
4. Schmid, N.; Eichenberger, A. P.; Choutko, A.; Riniker, S.; Winger, M.; Mark, A. E.; van Gunsteren, W. F., Definition and Testing of the Gromos Force-Field Versions 54a7 and 54b7. *European biophysics journal : EBJ* **2011**, *40*, 843-856.
5. Oostenbrink, C.; Villa, A.; Mark, A. E.; van Gunsteren, W. F., A Biomolecular Force Field Based on the Free Enthalpy of Hydration and Solvation: The Gromos Force-Field Parameter Sets 53a5 and 53a6. *J Comput Chem* **2004**, *25*, 1656-1676.
6. Van Der Spoel, D.; Lindahl, E.; Hess, B.; Groenhof, G.; Mark, A. E.; Berendsen, H. J., Gromacs: Fast, Flexible, and Free. *J Comput Chem* **2005**, *26*, 1701-1718.
7. Bussi, G.; Donadio, D.; Parrinello, M., Canonical Sampling through Velocity Rescaling. *The Journal of chemical physics* **2007**, *126*, 014101.
8. Tribello, G. A.; Bonomi, M.; Branduardi, D.; Camilloni, C.; Bussi, G., Plumed 2: New Feathers for an Old Bird. *Computer Physics Communications* **2014**, *185*, 604-613.
9. Parrinello, M.; Rahman, A., Polymorphic Transitions in Single Crystals: A New Molecular Dynamics Method. *Journal of Applied Physics* **1981**, *52*, 7182-7190.
10. Parrinello, M.; Rahman, A., Crystal Structure and Pair Potentials: A Molecular-Dynamics Study. *Physical Review Letters* **1980**, *45*, 1196-1199.

## SARS-COV-2 genomes generated in this study

|                 |                 |                 |                 |                 |
|-----------------|-----------------|-----------------|-----------------|-----------------|
| EPI_ISL_3050301 | EPI_ISL_2777407 | EPI_ISL_2777474 | EPI_ISL_2777510 | EPI_ISL_2777599 |
| EPI_ISL_2777325 | EPI_ISL_2777408 | EPI_ISL_2777475 | EPI_ISL_2777238 | EPI_ISL_2777600 |
| EPI_ISL_2777615 | EPI_ISL_2777409 | EPI_ISL_2777476 | EPI_ISL_2777511 | EPI_ISL_2777601 |
| EPI_ISL_2777433 | EPI_ISL_1034304 | EPI_ISL_2777477 | EPI_ISL_2777512 | EPI_ISL_2777603 |
| EPI_ISL_2777434 | EPI_ISL_2777410 | EPI_ISL_2777478 | EPI_ISL_2777513 | EPI_ISL_2777604 |
| EPI_ISL_2777436 | EPI_ISL_2777411 | EPI_ISL_2777479 | EPI_ISL_2777357 | EPI_ISL_2777605 |
| EPI_ISL_2777437 | EPI_ISL_2777412 | EPI_ISL_2777480 | EPI_ISL_2777358 | EPI_ISL_2777606 |
| EPI_ISL_2777438 | EPI_ISL_2777413 | EPI_ISL_2777481 | EPI_ISL_2777515 | EPI_ISL_2777609 |
| EPI_ISL_2777439 | EPI_ISL_2777414 | EPI_ISL_2777482 | EPI_ISL_2777516 | EPI_ISL_2777248 |
| EPI_ISL_2777440 | EPI_ISL_2777415 | EPI_ISL_2777483 | EPI_ISL_2777517 | EPI_ISL_2777612 |
| EPI_ISL_2777441 | EPI_ISL_1034306 | EPI_ISL_2777484 | EPI_ISL_2777518 | EPI_ISL_2777616 |
| EPI_ISL_2777443 | EPI_ISL_2777416 | EPI_ISL_2777485 | EPI_ISL_2777989 | EPI_ISL_2777618 |
| EPI_ISL_2777444 | EPI_ISL_2777417 | EPI_ISL_2777486 | EPI_ISL_2777990 | EPI_ISL_2777620 |
| EPI_ISL_2777445 | EPI_ISL_2777418 | EPI_ISL_2777487 | EPI_ISL_2777519 | EPI_ISL_2777621 |
| EPI_ISL_2777446 | EPI_ISL_2777419 | EPI_ISL_2778003 | EPI_ISL_2777520 | EPI_ISL_2777622 |
| EPI_ISL_2777448 | EPI_ISL_2777420 | EPI_ISL_2777488 | EPI_ISL_2777521 | EPI_ISL_2777624 |
| EPI_ISL_2777449 | EPI_ISL_2777421 | EPI_ISL_2777489 | EPI_ISL_2777522 | EPI_ISL_2777627 |
| EPI_ISL_2777450 | EPI_ISL_2777422 | EPI_ISL_2777491 | EPI_ISL_2777992 | EPI_ISL_2777980 |
| EPI_ISL_2777451 | EPI_ISL_2777423 | EPI_ISL_2777491 | EPI_ISL_1068291 | EPI_ISL_2777628 |
| EPI_ISL_2777452 | EPI_ISL_2777424 | EPI_ISL_2778001 | EPI_ISL_2777524 | EPI_ISL_2777630 |
| EPI_ISL_2777490 | EPI_ISL_2777425 | EPI_ISL_2778001 | EPI_ISL_2777525 | EPI_ISL_2777631 |
| EPI_ISL_2777311 | EPI_ISL_2777426 | EPI_ISL_2777492 | EPI_ISL_2777526 | EPI_ISL_2777632 |
| EPI_ISL_2777314 | EPI_ISL_2777427 | EPI_ISL_2777492 | EPI_ISL_2777527 | EPI_ISL_2777634 |
| EPI_ISL_2777547 | EPI_ISL_2777428 | EPI_ISL_2777493 | EPI_ISL_2778002 | EPI_ISL_2777635 |
| EPI_ISL_2777626 | EPI_ISL_2777429 | EPI_ISL_2777494 | EPI_ISL_2777528 | EPI_ISL_2777636 |
| EPI_ISL_2777650 | EPI_ISL_2777430 | EPI_ISL_1068279 | EPI_ISL_2777530 | EPI_ISL_2777637 |
| EPI_ISL_2777678 | EPI_ISL_2777430 | EPI_ISL_1068280 | EPI_ISL_1068292 | EPI_ISL_2777638 |
| EPI_ISL_2777689 | EPI_ISL_2777431 | EPI_ISL_1068281 | EPI_ISL_2777532 | EPI_ISL_2777639 |
| EPI_ISL_2777741 | EPI_ISL_2777431 | EPI_ISL_1068282 | EPI_ISL_2777533 | EPI_ISL_2777641 |
| EPI_ISL_2777851 | EPI_ISL_2777432 | EPI_ISL_1068283 | EPI_ISL_2777534 | EPI_ISL_2777642 |
| EPI_ISL_2777937 | EPI_ISL_2777432 | EPI_ISL_1068284 | EPI_ISL_2777535 | EPI_ISL_2777643 |
| EPI_ISL_2777947 | EPI_ISL_2777995 | EPI_ISL_1068285 | EPI_ISL_2777536 | EPI_ISL_2777645 |
| EPI_ISL_3050601 | EPI_ISL_2777996 | EPI_ISL_2777495 | EPI_ISL_2777537 | EPI_ISL_2777646 |
| EPI_ISL_1533609 | EPI_ISL_2777997 | EPI_ISL_1068286 | EPI_ISL_2777538 | EPI_ISL_2777647 |
| EPI_ISL_2777509 | EPI_ISL_2777998 | EPI_ISL_2778004 | EPI_ISL_2777539 | EPI_ISL_2777651 |
| EPI_ISL_2777356 | EPI_ISL_2777999 | EPI_ISL_2778005 | EPI_ISL_2777540 | EPI_ISL_2777654 |
| EPI_ISL_2777557 | EPI_ISL_2778000 | EPI_ISL_2777239 | EPI_ISL_2777541 | EPI_ISL_2777655 |
| EPI_ISL_2777562 | EPI_ISL_2777435 | EPI_ISL_2777236 | EPI_ISL_2777542 | EPI_ISL_2777657 |
| EPI_ISL_2777564 | EPI_ISL_2777453 | EPI_ISL_2777301 | EPI_ISL_2777543 | EPI_ISL_2777658 |
| EPI_ISL_2777591 | EPI_ISL_1068258 | EPI_ISL_2777240 | EPI_ISL_2777544 | EPI_ISL_2777659 |
| EPI_ISL_2777669 | EPI_ISL_1068260 | EPI_ISL_1068287 | EPI_ISL_2777545 | EPI_ISL_2777662 |
| EPI_ISL_2777690 | EPI_ISL_1068261 | EPI_ISL_1068288 | EPI_ISL_2777546 | EPI_ISL_2777668 |
| EPI_ISL_2777704 | EPI_ISL_1068262 | EPI_ISL_2777241 | EPI_ISL_2777549 | EPI_ISL_2777670 |
| EPI_ISL_2777327 | EPI_ISL_1068263 | EPI_ISL_2777246 | EPI_ISL_2777551 | EPI_ISL_2777675 |
| EPI_ISL_2777765 | EPI_ISL_1068264 | EPI_ISL_2777242 | EPI_ISL_2777553 | EPI_ISL_2777676 |
| EPI_ISL_2777875 | EPI_ISL_1068266 | EPI_ISL_1068289 | EPI_ISL_2777554 | EPI_ISL_2777683 |
| EPI_ISL_2777892 | EPI_ISL_1068267 | EPI_ISL_2777496 | EPI_ISL_2777556 | EPI_ISL_2777686 |
| EPI_ISL_2777898 | EPI_ISL_1068268 | EPI_ISL_2777496 | EPI_ISL_2777558 | EPI_ISL_2777687 |
| EPI_ISL_2777934 | EPI_ISL_1068269 | EPI_ISL_2777496 | EPI_ISL_2777559 | EPI_ISL_2777691 |
| EPI_ISL_2777963 | EPI_ISL_1068270 | EPI_ISL_1068290 | EPI_ISL_2777560 | EPI_ISL_2777692 |
| EPI_ISL_2777299 | EPI_ISL_1068271 | EPI_ISL_2777498 | EPI_ISL_2777561 | EPI_ISL_2777693 |
| EPI_ISL_3050363 | EPI_ISL_1068272 | EPI_ISL_2777499 | EPI_ISL_2777563 | EPI_ISL_2777290 |
| EPI_ISL_3050565 | EPI_ISL_1068273 | EPI_ISL_2777237 | EPI_ISL_2777565 | EPI_ISL_2777250 |
| EPI_ISL_3050558 | EPI_ISL_1068274 | EPI_ISL_2777302 | EPI_ISL_2777285 | EPI_ISL_2777251 |
| EPI_ISL_3050501 | EPI_ISL_1068275 | EPI_ISL_2777304 | EPI_ISL_2777566 | EPI_ISL_2777252 |
| EPI_ISL_3050624 | EPI_ISL_1068276 | EPI_ISL_2777501 | EPI_ISL_2777567 | EPI_ISL_2777253 |
| EPI_ISL_3050387 | EPI_ISL_1068278 | EPI_ISL_2777502 | EPI_ISL_2777569 | EPI_ISL_2777320 |
| EPI_ISL_2777994 | EPI_ISL_2777455 | EPI_ISL_2777503 | EPI_ISL_2777570 | EPI_ISL_2777696 |
| EPI_ISL_2777922 | EPI_ISL_2777456 | EPI_ISL_2777993 | EPI_ISL_2777571 | EPI_ISL_2777254 |
| EPI_ISL_1068268 | EPI_ISL_2777457 | EPI_ISL_2777504 | EPI_ISL_2777572 | EPI_ISL_2777255 |
| EPI_ISL_1068273 | EPI_ISL_2777457 | EPI_ISL_2777505 | EPI_ISL_2777573 | EPI_ISL_2777256 |
| EPI_ISL_2777396 | EPI_ISL_2777458 | EPI_ISL_2102018 | EPI_ISL_2777574 | EPI_ISL_2777697 |
| EPI_ISL_2777397 | EPI_ISL_2777458 | EPI_ISL_2777306 | EPI_ISL_2777575 | EPI_ISL_2777698 |
| EPI_ISL_2777398 | EPI_ISL_2777459 | EPI_ISL_2777506 | EPI_ISL_2777576 | EPI_ISL_2777699 |
| EPI_ISL_2777399 | EPI_ISL_2777459 | EPI_ISL_2777309 | EPI_ISL_2777581 | EPI_ISL_2777257 |
| EPI_ISL_2777401 | EPI_ISL_2777469 | EPI_ISL_2777986 | EPI_ISL_2777584 | EPI_ISL_2777700 |
| EPI_ISL_2777402 | EPI_ISL_2777469 | EPI_ISL_2777987 | EPI_ISL_2777585 | EPI_ISL_2777258 |
| EPI_ISL_2777403 | EPI_ISL_2777470 | EPI_ISL_2777507 | EPI_ISL_2777586 | EPI_ISL_2777259 |
| EPI_ISL_2777404 | EPI_ISL_2777471 | EPI_ISL_2777988 | EPI_ISL_2777588 | EPI_ISL_2777260 |
| EPI_ISL_2777405 | EPI_ISL_2777472 | EPI_ISL_2777313 | EPI_ISL_2777589 | EPI_ISL_2777701 |
| EPI_ISL_2777406 | EPI_ISL_2777473 | EPI_ISL_2777508 | EPI_ISL_2777593 | EPI_ISL_2777292 |



|                 |                 |                 |                 |                 |
|-----------------|-----------------|-----------------|-----------------|-----------------|
| EPI_ISL_2777981 | EPI_ISL_3050351 | EPI_ISL_3050599 | EPI_ISL_3050528 | EPI_ISL_2777846 |
| EPI_ISL_2777982 | EPI_ISL_3050530 | EPI_ISL_3050342 | EPI_ISL_3050380 | EPI_ISL_2777853 |
| EPI_ISL_2777633 | EPI_ISL_3050531 | EPI_ISL_3050395 | EPI_ISL_3050438 | EPI_ISL_2777856 |
| EPI_ISL_2777983 | EPI_ISL_3050352 | EPI_ISL_3050606 | EPI_ISL_3050361 | EPI_ISL_2777860 |
| EPI_ISL_2777984 | EPI_ISL_3050323 | EPI_ISL_3050607 | EPI_ISL_3050362 | EPI_ISL_2777343 |
| EPI_ISL_2777640 | EPI_ISL_3050432 | EPI_ISL_3050608 | EPI_ISL_3050440 | EPI_ISL_2777869 |
| EPI_ISL_2777649 | EPI_ISL_3050575 | EPI_ISL_3050609 | EPI_ISL_3050452 | EPI_ISL_2777890 |
| EPI_ISL_2777652 | EPI_ISL_3050518 | EPI_ISL_3050423 | EPI_ISL_3050486 | EPI_ISL_2777893 |
| EPI_ISL_2777656 | EPI_ISL_3050642 | EPI_ISL_3050396 | EPI_ISL_3050487 | EPI_ISL_2777895 |
| EPI_ISL_2777660 | EPI_ISL_3050297 | EPI_ISL_3050397 | EPI_ISL_3050645 | EPI_ISL_2777901 |
| EPI_ISL_2777661 | EPI_ISL_3050353 | EPI_ISL_3050491 | EPI_ISL_3050646 | EPI_ISL_2777902 |
| EPI_ISL_2777929 | EPI_ISL_3050497 | EPI_ISL_3050390 | EPI_ISL_3050453 | EPI_ISL_2777906 |
| EPI_ISL_2777663 | EPI_ISL_3050505 | EPI_ISL_3050408 | EPI_ISL_3050454 | EPI_ISL_2777907 |
| EPI_ISL_2777666 | EPI_ISL_3050584 | EPI_ISL_3050424 | EPI_ISL_3050455 | EPI_ISL_2777344 |
| EPI_ISL_2777667 | EPI_ISL_3050416 | EPI_ISL_3050533 | EPI_ISL_3050456 | EPI_ISL_2777912 |
| EPI_ISL_2777671 | EPI_ISL_3050418 | EPI_ISL_3050469 | EPI_ISL_3050495 | EPI_ISL_2777918 |
| EPI_ISL_2777673 | EPI_ISL_3050402 | EPI_ISL_3050498 | EPI_ISL_3050496 | EPI_ISL_2777920 |
| EPI_ISL_2777674 | EPI_ISL_3050545 | EPI_ISL_3050493 | EPI_ISL_3050632 | EPI_ISL_2777921 |
| EPI_ISL_2777679 | EPI_ISL_3050638 | EPI_ISL_3050494 | EPI_ISL_3050633 | EPI_ISL_2777926 |
| EPI_ISL_2777316 | EPI_ISL_3050521 | EPI_ISL_3050536 | EPI_ISL_3050634 | EPI_ISL_2777927 |
| EPI_ISL_2777680 | EPI_ISL_3050441 | EPI_ISL_3050537 | EPI_ISL_3050649 | EPI_ISL_2777930 |
| EPI_ISL_2777681 | EPI_ISL_3050592 | EPI_ISL_3050523 | EPI_ISL_3050514 | EPI_ISL_2777933 |
| EPI_ISL_2777682 | EPI_ISL_3050442 | EPI_ISL_3050524 | EPI_ISL_3050543 | EPI_ISL_2777945 |
| EPI_ISL_2777685 | EPI_ISL_3050435 | EPI_ISL_3050525 | EPI_ISL_3050544 | EPI_ISL_2777949 |
| EPI_ISL_2777695 | EPI_ISL_3050554 | EPI_ISL_3050509 | EPI_ISL_3050552 | EPI_ISL_2777951 |
| EPI_ISL_2777359 | EPI_ISL_3050459 | EPI_ISL_3050527 | EPI_ISL_2778008 | EPI_ISL_2777953 |
| EPI_ISL_2777332 | EPI_ISL_3050460 | EPI_ISL_3050328 | EPI_ISL_2778009 | EPI_ISL_2777957 |
| EPI_ISL_2777753 | EPI_ISL_3050461 | EPI_ISL_3050588 | EPI_ISL_3050386 | EPI_ISL_2777960 |
| EPI_ISL_2777756 | EPI_ISL_3050580 | EPI_ISL_3050589 | EPI_ISL_3050546 | EPI_ISL_2777288 |
| EPI_ISL_2777760 | EPI_ISL_3050581 | EPI_ISL_3050590 | EPI_ISL_2777442 | EPI_ISL_2777349 |
| EPI_ISL_2777773 | EPI_ISL_3050316 | EPI_ISL_3050383 | EPI_ISL_2777447 | EPI_ISL_2777350 |
| EPI_ISL_2777774 | EPI_ISL_3050547 | EPI_ISL_3050569 | EPI_ISL_2777514 | EPI_ISL_2777351 |
| EPI_ISL_2777778 | EPI_ISL_3050317 | EPI_ISL_3050600 | EPI_ISL_2777529 | EPI_ISL_2777352 |
| EPI_ISL_2777810 | EPI_ISL_3050331 | EPI_ISL_3050602 | EPI_ISL_2777550 | EPI_ISL_2777353 |
| EPI_ISL_2777813 | EPI_ISL_3050557 | EPI_ISL_3050472 | EPI_ISL_2777555 | EPI_ISL_2777354 |
| EPI_ISL_2777814 | EPI_ISL_3050559 | EPI_ISL_3050611 | EPI_ISL_2777577 | EPI_ISL_2777355 |
| EPI_ISL_2777824 | EPI_ISL_3050560 | EPI_ISL_3050500 | EPI_ISL_2777580 | EPI_ISL_2777968 |
| EPI_ISL_2777825 | EPI_ISL_3050356 | EPI_ISL_3050612 | EPI_ISL_2777592 | EPI_ISL_3050616 |
| EPI_ISL_2777852 | EPI_ISL_3050346 | EPI_ISL_3050603 | EPI_ISL_2777594 | EPI_ISL_3050574 |
| EPI_ISL_2777854 | EPI_ISL_3050329 | EPI_ISL_3050625 | EPI_ISL_2777596 | EPI_ISL_3050458 |
| EPI_ISL_2777865 | EPI_ISL_3050365 | EPI_ISL_3050626 | EPI_ISL_2777598 | EPI_ISL_3050488 |
| EPI_ISL_2777866 | EPI_ISL_3050388 | EPI_ISL_3050628 | EPI_ISL_2777607 | EPI_ISL_3050504 |
| EPI_ISL_2777887 | EPI_ISL_3050358 | EPI_ISL_3050629 | EPI_ISL_2777610 | EPI_ISL_3050572 |
| EPI_ISL_2777891 | EPI_ISL_3050404 | EPI_ISL_3050637 | EPI_ISL_2777613 | EPI_ISL_3050573 |
| EPI_ISL_2777904 | EPI_ISL_3050338 | EPI_ISL_3050571 | EPI_ISL_2777619 | EPI_ISL_3050576 |
| EPI_ISL_2777905 | EPI_ISL_3050420 | EPI_ISL_3050613 | EPI_ISL_2777623 | EPI_ISL_3050577 |
| EPI_ISL_2777908 | EPI_ISL_3050586 | EPI_ISL_3050296 | EPI_ISL_2777629 | EPI_ISL_3050578 |
| EPI_ISL_2777909 | EPI_ISL_3050587 | EPI_ISL_3050614 | EPI_ISL_2777644 | EPI_ISL_3050579 |
| EPI_ISL_2777910 | EPI_ISL_3050359 | EPI_ISL_3050368 | EPI_ISL_2777648 | EPI_ISL_3050553 |
| EPI_ISL_2777914 | EPI_ISL_3050489 | EPI_ISL_3050369 | EPI_ISL_2777653 | EPI_ISL_3050382 |
| EPI_ISL_2777924 | EPI_ISL_3050462 | EPI_ISL_3050370 | EPI_ISL_2777664 | EPI_ISL_3050364 |
| EPI_ISL_2777925 | EPI_ISL_3050463 | EPI_ISL_3050371 | EPI_ISL_2777665 | EPI_ISL_3050433 |
| EPI_ISL_2777928 | EPI_ISL_3050467 | EPI_ISL_3050385 | EPI_ISL_2777672 | EPI_ISL_3050417 |
| EPI_ISL_2777931 | EPI_ISL_3050318 | EPI_ISL_3050392 | EPI_ISL_2777677 | EPI_ISL_3050520 |
| EPI_ISL_2777941 | EPI_ISL_3050334 | EPI_ISL_3050640 | EPI_ISL_2777684 | EPI_ISL_3050443 |
| EPI_ISL_2777942 | EPI_ISL_3050325 | EPI_ISL_3050393 | EPI_ISL_2777688 | EPI_ISL_3050355 |
| EPI_ISL_2777943 | EPI_ISL_3050561 | EPI_ISL_3050474 | EPI_ISL_2777694 | EPI_ISL_3050555 |
| EPI_ISL_2777944 | EPI_ISL_3050582 | EPI_ISL_3050475 | EPI_ISL_2777712 | EPI_ISL_3050585 |
| EPI_ISL_2777985 | EPI_ISL_3050421 | EPI_ISL_3050510 | EPI_ISL_2777329 | EPI_ISL_3050507 |
| EPI_ISL_2777946 | EPI_ISL_3050619 | EPI_ISL_3050511 | EPI_ISL_2777335 | EPI_ISL_3050556 |
| EPI_ISL_2777956 | EPI_ISL_3050620 | EPI_ISL_3050630 | EPI_ISL_2777336 | EPI_ISL_3050567 |
| EPI_ISL_2777958 | EPI_ISL_3050300 | EPI_ISL_3050631 | EPI_ISL_2777337 | EPI_ISL_3050532 |
| EPI_ISL_2777959 | EPI_ISL_3050621 | EPI_ISL_3050409 | EPI_ISL_2777338 | EPI_ISL_3050548 |
| EPI_ISL_2777991 | EPI_ISL_3050622 | EPI_ISL_3050540 | EPI_ISL_2777339 | EPI_ISL_3050324 |
| EPI_ISL_2777961 | EPI_ISL_3050604 | EPI_ISL_3050349 | EPI_ISL_2777761 | EPI_ISL_3050549 |
| EPI_ISL_2777966 | EPI_ISL_3050639 | EPI_ISL_3050379 | EPI_ISL_2777770 | EPI_ISL_3050345 |
| EPI_ISL_2777967 | EPI_ISL_3050305 | EPI_ISL_3050437 | EPI_ISL_2777341 | EPI_ISL_3050405 |
| EPI_ISL_3050457 | EPI_ISL_3050326 | EPI_ISL_3050478 | EPI_ISL_2777342 | EPI_ISL_3050419 |
| EPI_ISL_3050515 | EPI_ISL_3050311 | EPI_ISL_3050480 | EPI_ISL_2777777 | EPI_ISL_3050295 |
| EPI_ISL_3050591 | EPI_ISL_3050327 | EPI_ISL_3050481 | EPI_ISL_2777809 | EPI_ISL_3050304 |
| EPI_ISL_3050641 | EPI_ISL_3050594 | EPI_ISL_3050482 | EPI_ISL_2777822 | EPI_ISL_3050465 |
| EPI_ISL_3050615 | EPI_ISL_3050595 | EPI_ISL_3050483 | EPI_ISL_2777826 | EPI_ISL_3050466 |
| EPI_ISL_3050516 | EPI_ISL_3050522 | EPI_ISL_3050484 | EPI_ISL_2777831 | EPI_ISL_3050508 |
| EPI_ISL_3050517 | EPI_ISL_3050468 | EPI_ISL_3050485 | EPI_ISL_2777832 | EPI_ISL_3050299 |
| EPI_ISL_3050617 | EPI_ISL_3050341 | EPI_ISL_3050643 | EPI_ISL_2777835 | EPI_ISL_3050339 |
| EPI_ISL_3050618 | EPI_ISL_3050597 | EPI_ISL_3050644 | EPI_ISL_2777836 | EPI_ISL_3050310 |

EPI\_ISL\_3050340  
EPI\_ISL\_3050306  
EPI\_ISL\_3050333  
EPI\_ISL\_3050596  
EPI\_ISL\_3050320  
EPI\_ISL\_3050598  
EPI\_ISL\_3050366  
EPI\_ISL\_3050389  
EPI\_ISL\_3050347  
EPI\_ISL\_3050610  
EPI\_ISL\_3050422  
EPI\_ISL\_3050492  
EPI\_ISL\_3050534  
EPI\_ISL\_3050535  
EPI\_ISL\_3050526  
EPI\_ISL\_3050550  
EPI\_ISL\_3050568  
EPI\_ISL\_3050623  
EPI\_ISL\_3050473  
EPI\_ISL\_3050539  
EPI\_ISL\_3050348  
EPI\_ISL\_3050372  
EPI\_ISL\_3050313  
EPI\_ISL\_3050321  
EPI\_ISL\_3050343  
EPI\_ISL\_3050330  
EPI\_ISL\_3050335  
EPI\_ISL\_3050336  
EPI\_ISL\_3050360  
EPI\_ISL\_3050373  
EPI\_ISL\_3050374  
EPI\_ISL\_3050377  
EPI\_ISL\_3050378  
EPI\_ISL\_3050398  
EPI\_ISL\_3050399  
EPI\_ISL\_3050400  
EPI\_ISL\_3050410  
EPI\_ISL\_3050411  
EPI\_ISL\_3050412  
EPI\_ISL\_3050413  
EPI\_ISL\_3050425  
EPI\_ISL\_3050426  
EPI\_ISL\_3050427  
EPI\_ISL\_3050428  
EPI\_ISL\_3050429  
EPI\_ISL\_3050430  
EPI\_ISL\_3050414  
EPI\_ISL\_3050444  
EPI\_ISL\_3050445  
EPI\_ISL\_3050446  
EPI\_ISL\_3050447  
EPI\_ISL\_3050476  
EPI\_ISL\_3050477  
EPI\_ISL\_3050512  
EPI\_ISL\_3050513  
EPI\_ISL\_3050448  
EPI\_ISL\_3050449  
EPI\_ISL\_3050450  
EPI\_ISL\_3050451  
EPI\_ISL\_3050541  
EPI\_ISL\_3050542  
EPI\_ISL\_3050583  
EPI\_ISL\_3050562  
EPI\_ISL\_3050479  
EPI\_ISL\_3050439  
EPI\_ISL\_3050563  
EPI\_ISL\_3050635  
EPI\_ISL\_3050647  
EPI\_ISL\_3050648  
EPI\_ISL\_3050650  
EPI\_ISL\_3050314  
EPI\_ISL\_3050564  
EPI\_ISL\_3050350
